# Supplementary material
Source: MDPI journal article supplement (https://www.mdpi.com/2079-6412/9/11/766)
Supplement: s1 [file s1]

# A Facile Way to Improve the Performance of Perovskite Solar Cells by Toluene and Diethyl Ether Mixed Anti-Solvent Engineering

Haifeng Yang <sup>1</sup>, Hui Wang <sup>2</sup>, Jincheng Zhang <sup>3</sup>, Jingjing Chang <sup>3</sup> and Chunfu Zhang <sup>3,\*</sup>

<sup>1</sup> College of Physics and Optoelectronics Technology, Medical Micro-nano Materials Research Center, Baoji University of Arts and Sciences, Baoji 721016, China; faircl@163.com

<sup>2</sup> Department of Chemistry and Chemical Engineering, Shaanxi Key Laboratory of Phytochemistry, Baoji University of Arts and Science, Baoji 721013, China; wangkejian@163.com

<sup>3</sup> Wide Bandgap Semiconductor Technology Disciplines State Key Laboratory, School of Microelectronics, Xidian University, Xi'an 710071, China; jchzhang@xidian.edu.cn (J.Z.); jjingchang@xidian.edu.cn (J.C.)

\* Correspondence: cfzhang@xidian.edu.cn

Received: 29 October 2019; Accepted: 15 November 2019; Published: date

## Supplementary Materials

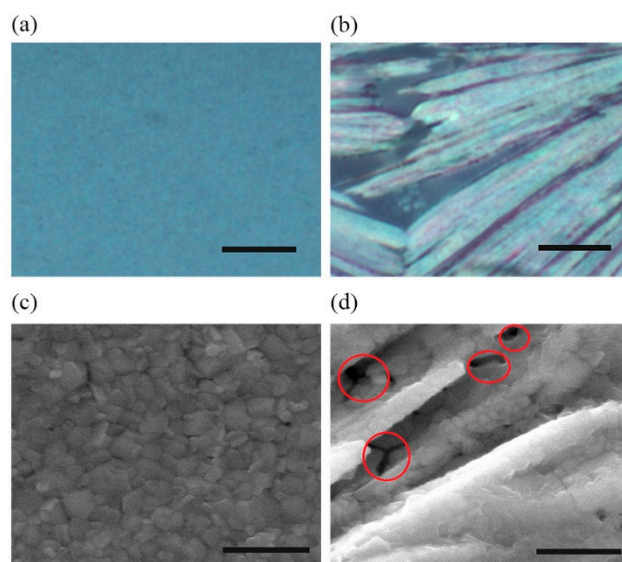

**Figure S1.** Optical microscope images of (a) the control perovskite film adopting pure toluene as anti-solvent and (b) the perovskite film without involving anti-solvent. The scale bar in optical microscope images is 500  $\mu\text{m}$ . SEM topography images of (c) the control perovskite film and (d) the perovskite film without involving anti-solvent. The scale bar in SEM images is 1  $\mu\text{m}$ .

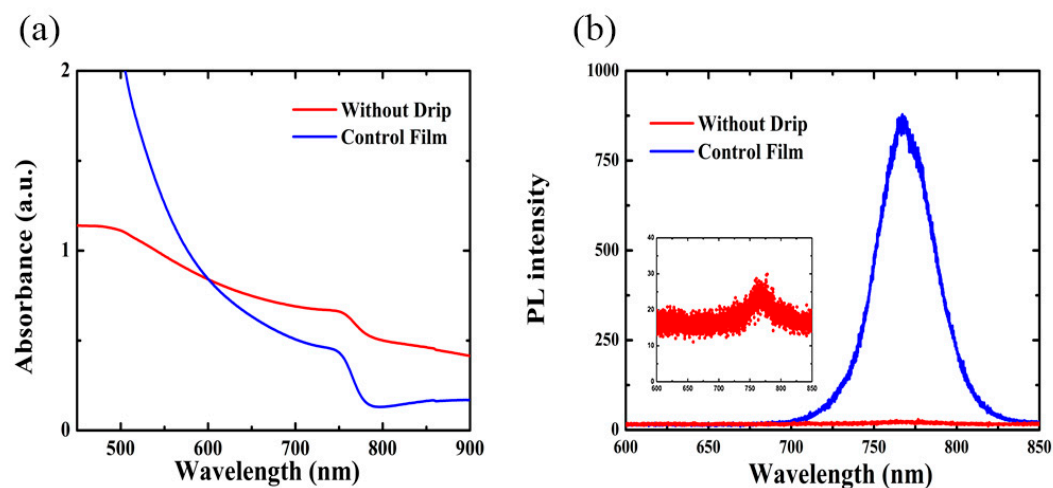

**Figure S2.** (a) The wavelength-dependent absorbance spectra and (b) steady-state photoluminescence (PL) spectra for control film and the film without involving anti-solvent. Inset picture in (b) is the high magnification for the film without involving anti-solvent.

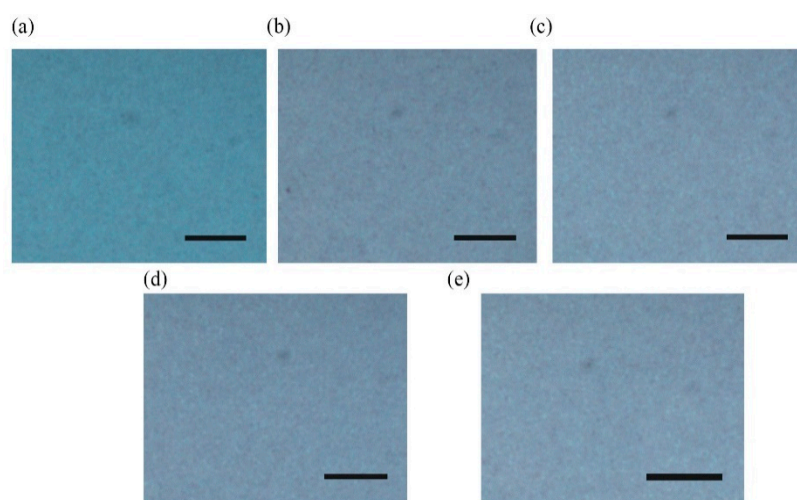

**Figure S3.** Optical microscope images of perovskite films treated with (a) 100% (b) 75% (c) 50% (d) 25% and (e) 0% toluene in the mixed anti-solvent. The scale bar in optical microscope images is images is 500  $\mu\text{m}$ .

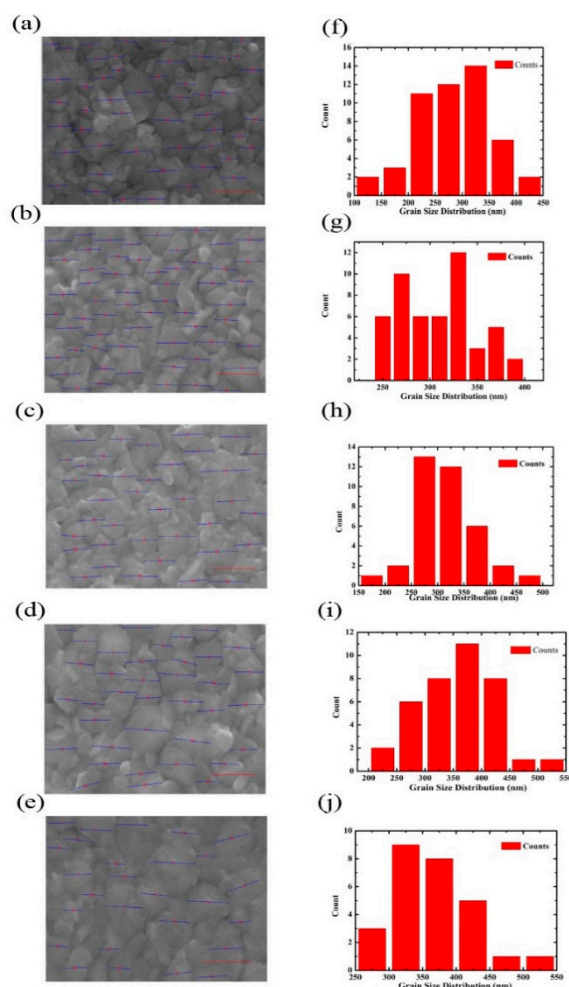

**Figure S4.** SEM images and grain size distribution histograms of perovskite films treated with (a) 100% (b) 75% (c) 50% (d) 25% and (e) 0% toluene in the mixed anti-solvent. Image size was  $2.5 \mu\text{m} \times 2.5 \mu\text{m}$ .

**Table S1.** Polarity index and boiling point of the commonly used solvent as anti-solvent.

| Solvent          | Polarity Index | Boiling Point ( $^{\circ}\text{C}$ ) |
|------------------|----------------|--------------------------------------|
| Chlorobenzene    | 2.7            | 132.2                                |
| Isopropanol(IPA) | 3.9            | 82.4                                 |
| Toluene          | 2.4            | 110.6                                |
| Chloroform       | 4.1            | 61.3                                 |
| Diethyl Ether    | 2.8            | 34.6                                 |
| Dichlorobenzene  | 2.7            | 180.5                                |

**Table S2.** Peak intensity of perovskite films prepared from different mixed anti-solvent obtained from XRD.

| Proportion of Toluene in the Mixed Anti-Solvent (%) | (110) Peak Intensity | (220) Peak Intensity | Ratio of (110)/(220) |
|-----------------------------------------------------|----------------------|----------------------|----------------------|
| 100%                                                | 2921                 | 1505                 | 1.94                 |
| 25%                                                 | 3389                 | 1540                 | 2.20                 |
| 50%                                                 | 3958                 | 1713                 | 2.31                 |
| 75%                                                 | 2876                 | 1343                 | 2.14                 |
| 0%                                                  | 1367                 | 888                  | 1.54                 |

**Table S3.** The average value of hysteresis indices (HI) of PSCs obtained with different mixed anti-solvent.

| <b>Proportion of Toluene<br/>in the Mixed Anti-<br/>Solvent (%)</b> | <b>100%</b> | <b>75%</b> | <b>50%</b> | <b>25%</b> | <b>0%</b> |
|---------------------------------------------------------------------|-------------|------------|------------|------------|-----------|
| HI                                                                  | 0.046       | 0.040      | 0.035      | 0.043      | 0.054     |

<sup>a</sup> Each value of HI is extracted from 5 PSCs.
